# Supplementary material
Source: ML conference proceedings conference paper supplement (https://openreview.net/forum?id=SQbrWcMOcPR)
Supplement: supplementary_material [file attachment]

## A Further memory and speed comparison

| Dataset | Model & # Param    | Package | Time(sec) / Epoch | Memory (GB)   |
|---------|--------------------|---------|-------------------|---------------|
| CIFAR10 | ResNet18<br>11M    | Opacus  | 59                | 8.30   14.05  |
|         |                    | Ghost   | 65                | 2.21   3.31   |
|         |                    | Mixed   | 44                | 2.21   3.31   |
|         |                    | NonDP   | 14                | 2.20   3.31   |
|         | ResNet34<br>21M    | Opacus  | OOM               | OOM           |
|         |                    | Ghost   | 109               | 2.64   3.61   |
|         |                    | Mixed   | 77                | 2.64   3.61   |
|         |                    | NonDP   | 24                | 2.63   3.61   |
|         | ResNet50<br>23.5M  | Opacus  | OOM               | OOM           |
|         |                    | Ghost   | 174               | 8.85   11.6   |
|         |                    | Mixed   | 137               | 8.85   11.6   |
|         |                    | NonDP   | 53                | 8.7   11.6    |
|         | ResNet101<br>42.5M | Opacus  | OOM               | OOM           |
|         |                    | Ghost   | 275               | 10.52   11.81 |
|         |                    | Mixed   | 237               | 10.52   11.81 |
|         |                    | NonDP   | 91                | 10.36   11.76 |
|         | ResNet152<br>58.2M | Opacus  | OOM               | OOM           |
|         |                    | Ghost   | 350               | 12.54   13.90 |
|         |                    | Mixed   | 389               | 12.54   13.90 |
|         |                    | NonDP   | 133               | 12.39   13.89 |
|         | VGG11<br>9M        | Opacus  | 40                | 6.19   14.11  |
|         |                    | Ghost   | 18                | 1.85   2.89   |
|         |                    | Mixed   | 16                | 1.85   2.89   |
|         |                    | NonDP   | 5                 | 1.83   2.86   |
|         | VGG13<br>9.4M      | Opacus  | 43                | 6.72   14.18  |
|         |                    | Ghost   | 29                | 1.94   3.53   |
|         |                    | Mixed   | 22                | 1.94   3.53   |
|         |                    | NonDP   | 7                 | 1.93   3.53   |
|         | VGG16<br>14.7M     | Opacus  | OOM               | OOM           |
|         |                    | Ghost   | 35                | 2   3.57      |
|         |                    | Mixed   | 28                | 2   3.57      |
|         |                    | NonDP   | 9                 | 1.98   3.57   |
|         | VGG19<br>20.0M     | Opacus  | OOM               | OOM           |
|         |                    | Ghost   | 40                | 2.05   3.63   |
|         |                    | Mixed   | 33                | 2.05   3.63   |
|         |                    | NonDP   | 11                | 2.03   3.59   |
|         | ResNeXt<br>9.1M    | Opacus  | 162               | 10.77   12.51 |
|         |                    | Ghost   | 189               | 6.93   7.05   |
|         |                    | Mixed   | 140               | 6.93   7.05   |
|         |                    | NonDP   | 54                | 6.56   6.99   |
|         | MobileNet<br>3.2M  | Opacus  | 46                | 7.24   13.93  |
|         |                    | Ghost   | 42                | 2.95   4.91   |
|         |                    | Mixed   | 36                | 2.95   4.91   |
|         |                    | NonDP   | 9                 | 2.94   4.91   |

Table 6: Time and memory of models on CIFAR10, with physical batch size 128. There are two types of memory: active memory (left) and total memory (right). Out of memory (OOM) means the total memory exceeds 16GB. FastGradClip is excluded due to inflexibility to apply on general architectures.

| Dataset  | Model<br>& # Param         | Package | Time(sec) / Epoch | Memory (GB) | Max<br>Batch Size | Min<br>Time/Epoch |
|----------|----------------------------|---------|-------------------|-------------|-------------------|-------------------|
| ImageNet | Resnet18<br>11.7M          | Opacus  | 392               | 3.20/4.35   | 145               | 138               |
|          |                            | Ghost   | OOM               | OOM         | 7                 | 1093              |
|          |                            | Mixed   | 410               | 1.74/2.34   | 325               | 370               |
|          |                            | NonDP   | 349               | 1.73/2.34   | 678               | 114               |
|          | Resnet34<br>21.8M          | Opacus  | 444               | 5.29/5.94   | 93                | 197               |
|          |                            | Ghost   | OOM               | OOM         | 7                 | 1482              |
|          |                            | Mixed   | 478               | 2.01/2.62   | 282               | 428               |
|          |                            | NonDP   | 373               | 2.01/2.62   | 455               | 114               |
|          | Resnet50<br>25.6M          | Opacus  | 518               | 9.13/10.73  | 55                | 316               |
|          |                            | Ghost   | OOM               | OOM         | 7                 | 1896              |
|          |                            | Mixed   | 545               | 4.49/5.93   | 129               | 343               |
|          |                            | NonDP   | 385               | 4.47/5.93   | 161               | 136               |
|          | Resnet101<br>44.6M         | Opacus  | 762               | 11.53/12.80 | 28                | 735               |
|          |                            | Ghost   | OOM               | OOM         | 7                 | 2816              |
|          |                            | Mixed   | 784               | 5.53/6.65   | 89                | 578               |
|          |                            | NonDP   | 430               | 5.51/6.65   | 99                | 232               |
|          | Resnet152<br>60.2M         | Opacus  | OOM               | OOM         | 22                | 1365              |
|          |                            | Ghost   | OOM               | OOM         | 7                 | 3789              |
|          |                            | Mixed   | 1109              | 6.77/7.91   | 57                | 887               |
|          |                            | NonDP   | 500               | 6.75/7.91   | 83                | 348               |
|          | VGG11<br>132.9M            | Opacus  | OOM               | OOM         | <5                | NA                |
|          |                            | Ghost   | OOM               | OOM         | 0                 | NA                |
|          |                            | Mixed   | 441               | 5.23/7.47   | 71                | 347               |
|          |                            | NonDP   | 361               | 4.96/6.34   | 145               | 148               |
|          | VGG13<br>133.1M            | Opacus  | OOM               | OOM         | <5                | NA                |
|          |                            | Ghost   | OOM               | OOM         | 0                 | NA                |
|          |                            | Mixed   | 630               | 7.51/12.46  | 40                | 610               |
|          |                            | NonDP   | 375               | 5.86/9.76   | 99                | 195               |
|          | VGG16<br>138.4M            | Opacus  | OOM               | OOM         | <5                | NA                |
|          |                            | Ghost   | OOM               | OOM         | 0                 | NA                |
|          |                            | Mixed   | 755               | 7.81/12.48  | 35                | 796               |
|          |                            | NonDP   | 385               | 6.12/9.24   | 87                | 277               |
|          | VGG19<br>143.7M            | Opacus  | OOM               | OOM         | <5                | NA                |
|          |                            | Ghost   | OOM               | OOM         | 0                 | NA                |
|          |                            | Mixed   | 891               | 8.11/12.35  | 30                | 870               |
|          |                            | NonDP   | 395               | 6.37/9.28   | 90                | 380               |
|          | wide_resnet50_2<br>68.9M   | Opacus  | OOM               | OOM         | 17                | 979               |
|          |                            | Ghost   | OOM               | OOM         | 8                 | 2242              |
|          |                            | Mixed   | 709               | 7.52/12.19  | 91                | 626               |
|          |                            | NonDP   | 409               | 7.5/12.19   | 115               | 257               |
|          | wide_resnet101_2<br>126.9M | Opacus  | OOM               | OOM         | 8                 | 2125              |
|          |                            | Ghost   | OOM               | OOM         | 8                 | 3208              |
|          |                            | Mixed   | 1210              | 9.01/13.59  | 53                | 1088              |
|          |                            | NonDP   | 536               | 8.99/13.59  | 65                | 470               |
|          | resnext50_32x4d<br>25.0M   | Opacus  | 590               | 10.04/13.34 | 40                | 511               |
|          |                            | Ghost   | OOM               | OOM         | 10                | 2141              |
|          |                            | Mixed   | 685               | 7.36/8.98   | 87                | 536               |
|          |                            | NonDP   | 398               | 7.34/8.97   | 120               | 196               |
|          | Densenet121<br>8.0M        | Opacus  | 851               | 6.92/7.97   | 73                | 645               |
|          |                            | Ghost   | OOM               | OOM         | 10                | 2912              |
|          |                            | Mixed   | 802               | 4.34/5.33   | 79                | 490               |
|          |                            | NonDP   | 453               | 4.11/5.32   | 100               | 161               |
|          | Densenet169<br>14.2M       | Opacus  | 1158              | 9.04/9.61   | 54                | 698               |
|          |                            | Ghost   | OOM               | OOM         | 10                | 3533              |
|          |                            | Mixed   | 1062              | 5.58/6.04   | 66                | 625               |
|          |                            | NonDP   | 496               | 5.18/5.58   | 78                | 208               |

|  |                        |        |      |             |      |      |
|--|------------------------|--------|------|-------------|------|------|
|  | Densenet201<br>20.0M   | Opacus | 1224 | 12.99/13.56 | 33   | 1481 |
|  |                        | Ghost  | OOM  | OOM         | 10   | 3974 |
|  |                        | Mixed  | 1265 | 8.39/8.99   | 48   | 805  |
|  |                        | NonDP  | 547  | 7.91/8.96   | 56   | 280  |
|  | Alexnet<br>61.1M       | Opacus | OOM  | OOM         | 10   | 175  |
|  |                        | Ghost  | 408  | 2.60/3.41   | 154  | 455  |
|  |                        | Mixed  | 393  | 1.01/1.31   | 1111 | 122  |
|  |                        | NonDP  | 379  | 1.01/1.31   | 2380 | 117  |
|  | squeezeNet1_0<br>1.25M | Opacus | 404  | 2.79/4.06   | 269  | 335  |
|  |                        | Ghost  | OOM  | OOM         | 11   | 859  |
|  |                        | Mixed  | 415  | 2.01/3.22   | 312  | 118  |
|  |                        | NonDP  | 366  | 2.00/3.22   | 393  | 101  |
|  | squeezeNet1_1<br>1.24M | Opacus | 404  | 2.07/3.79   | 470  | 158  |
|  |                        | Ghost  | OOM  | OOM         | 11   | 679  |
|  |                        | Mixed  | 426  | 1.67/2.84   | 501  | 113  |
|  |                        | NonDP  | 341  | 1.65/2.84   | 650  | 108  |

Table 7: Time and memory of models [42] on ImageNet. There are two types of memory: active memory (left) and total memory (right). Out of memory (OOM) means the total memory exceeds 16GB. FastGradClip is excluded due to inflexibility to apply on general architectures. For the time per epoch and the memory columns, we use fixed physical batch size 25. For the max (physical) batch size and the min time/epoch (using the max batch size) columns, we use bisection method. We use 50000 images as training set.

## B Explaining convolutional layers

In a 2D convolutional layer, the input  $\mathbf{a}$  to the layer has dimension  $(B, d, H_{\text{in}}, W_{\text{in}})$  and the folded output  $F(\mathbf{s})$  has dimension  $(B, p, H_{\text{out}}, W_{\text{out}})$ , where  $B$  is the batch size,  $d$  is the number of input channels, and  $p$  is the number of output channels.  $H, W$  are the height and width of images (or hidden features in hidden layers).  $H_{\text{out}}, W_{\text{out}}$  can be calculated by <https://pytorch.org/docs/stable/generated/torch.nn.Conv2d.html> as

$$H_{\text{out}} = \left\lfloor \frac{H_{\text{in}} + 2 \times \text{padding} - \text{dilation} \times (k_H - 1) - 1}{\text{stride}} + 1 \right\rfloor,$$

and

$$W_{\text{out}} = \left\lfloor \frac{W_{\text{in}} + 2 \times \text{padding} - \text{dilation} \times (k_W - 1) - 1}{\text{stride}} + 1 \right\rfloor.$$

Following the above formulae, we recall that in the layerwise decision of mixed ghost clipping (3), the kernel size increases the right hand side and decreases the left hand size. In words, large kernel size always favors the ghost norm over the per-sample gradient instantiation!

To further explain the convolution, we consider the kernel size  $(k_H, k_W)$  to (2.5), which establishes the equivalence between linear layer and convolutional layer. See example in <https://pytorch.org/docs/stable/generated/torch.nn.Unfold.html>.

$$\begin{array}{ccccccc} & & \text{Conv2d}(\mathbf{a}_i) & & & & \\ \mathbf{a}_i & \longrightarrow & U(\mathbf{a}_i) & \longrightarrow & U(\mathbf{a}_i)\mathbf{W} + \mathbf{b} & \longrightarrow & F(U(\mathbf{a}_i)\mathbf{W} + \mathbf{b}) \\ (H_{\text{in}}, W_{\text{in}}, d) & \longrightarrow & (H_{\text{out}}, W_{\text{out}}, dk_H k_W) & \longrightarrow & (H_{\text{out}} W_{\text{out}}, p) & \longrightarrow & (H_{\text{out}}, W_{\text{out}}, p) \end{array}$$

## C Complexity analysis

In this section, we analyze the time and space complexity of different modules in the DP training pipeline. Our analysis follows a per-layer fashion, as all the dimension constants are layer-specific but ignored only in this section.

To simplify the representation and avoid the folding/unfolding  $U, F$ , we refer the forward pass of convolutional layer in (2.5) to the equivalent formula of linear layer in (2.2), with  $\mathbf{a}_i \in \mathbb{R}^{T \times D}$  denoting  $U(\mathbf{a}_i)$ ,  $\mathbf{s}_i \in \mathbb{R}^{T \times p}$  denoting  $F^{-1}(\mathbf{s}_i)$ . Here  $T = H_{\text{out}} W_{\text{out}}$ ,  $D = dk_H k_W$ , where  $d, p, k, H, W$

are layer-dependent and have been introduced in the previous section. We ignore the bias without loss of generality.

### C.1 Forward pass, Initialization, etc.

We note that the activation  $\mathbf{a}_i$  is created during the forward pass, and that  $\mathbf{W}$  is created during the random initialization. Since we only initialize and forward pass once, this complexity is the same for all training procedures (DP or non-private), therefore we do not study it. We also omit some trivial operations such as converting from per-sample gradient norm to the clipping factor  $C_i = \min(R/\|\frac{\partial \mathcal{L}_i}{\partial \mathbf{W}}\|_{\text{Fro}}, 1)$ .

In what follows, we will use the complexity of matrix multiplication repeatedly.

**Lemma C.1.** *For the matrix multiplication between  $\mathbb{R}^{m \times n}$  and  $\mathbb{R}^{n \times r}$ , the space complexity is  $mr$ , and the time complexity is  $2mnr$ .*

### C.2 Back-propagation

Referring to the back-propagation in (2.3), we derive the whole time complexity is the matrix multiplication of  $(B \times T \times p) \cdot (p \times D) \circ (B \times T \times D)$ , which is  $2BTDp + 2BTD$  and the space complexity is  $BTp + pD + 2BTD$ .

The last step (2.6) results in the per-sample gradients, where

$$\frac{\partial \mathcal{L}_i}{\partial \mathbf{W}} = \sum_i \frac{\partial \mathcal{L}}{\partial \mathbf{s}_i} \mathbf{a}_i$$

which gives  $2BTpD$  time complexity and  $pD$  space complexity (since per-sample gradients are summed in-place).

In total we have  $4BTpD + 2BTD$  time complexity and  $BTp + 2BTD + pD$  space complexity for one back-propagation.

For the second round of back-propagation, we add another time complexity  $4BTpD + 2BTD$  but no space complexity as the space is freed by `torch.optim.Optimizer.zero_grad()`.

### C.3 Ghost norm

In this section we study the procedure of computing the ghost norm. That is, from inputs  $\frac{\partial \mathcal{L}}{\partial \mathbf{s}_i}, \mathbf{a}_i$  to the output  $\|\frac{\partial \mathcal{L}_i}{\partial \mathbf{W}}\|_{\text{Fro}}^2$ .

As mentioned in (2.7), the clipping norm can be calculated as following:

$$\|\frac{\partial \mathcal{L}_i}{\partial \mathbf{W}}\|_{\text{Fro}}^2 = \text{vec}(\mathbf{a}_i \mathbf{a}_i^\top) \text{vec} \left( \frac{\partial \mathcal{L}}{\partial \mathbf{s}_i} \frac{\partial \mathcal{L}}{\partial \mathbf{s}_i}^\top \right)$$

where  $\|\cdot\|_{\text{Fro}}$  is the Frobenius norm and  $\text{vec}$  flattens the matrices to vectors. Since  $\mathbf{a}_i \in \mathbb{R}^{T \times D}, \mathbf{s}_i \in \mathbb{R}^{T \times p}$ . We then compute and store  $\mathbf{a}_i \mathbf{a}_i^\top \in \mathbb{R}^{T \times T}$  and  $\frac{\partial \mathcal{L}}{\partial \mathbf{s}_i} \frac{\partial \mathcal{L}}{\partial \mathbf{s}_i}^\top \in \mathbb{R}^{T \times T}$ , where time complexity is  $2T^2D + 2T^2p$  and the space complexity is  $2T^2$ . For  $B$  data points, the time complexity is  $B(2T^2D + 2T^2p)$  and the space complexity is  $2BT^2$ .

The final vector-vector product for a batch takes the time complexity is  $B(2T^2 - 1)$  and space complexity  $B$ .

### C.4 Gradient instantiation and the norm

In this section we study the procedure of computing norm via instantiating the per-sample gradients. That is, from inputs  $\frac{\partial \mathcal{L}}{\partial \mathbf{s}_i}, \mathbf{a}_i$ , to the intermediate  $\frac{\partial \mathcal{L}_i}{\partial \mathbf{W}}$ , to the output  $\|\frac{\partial \mathcal{L}_i}{\partial \mathbf{W}}\|_{\text{Fro}}^2$ .

To compute the per-sample gradients, which is not available in the first back-propagation due to the in-place summation, we need to re-compute

$$\frac{\partial \mathcal{L}_i}{\partial \mathbf{W}} = \frac{\partial \mathcal{L}}{\partial \mathbf{s}_i} \mathbf{a}_i.$$

For a batch, the time complexity is  $2BTpD$  and the space complexity is  $BpD$ .

To calculate the norm of  $\{\frac{\partial \mathcal{L}_i}{\partial \mathbf{W}}\}_i$ , each with size  $D \times p$ , the time complexity is  $2BDp$  and the space complexity is  $B$ .

### C.5 Weighted gradient

To calculate the weighted gradient,  $\{\frac{\partial \mathcal{L}_i}{\partial \mathbf{W}}\}_i \rightarrow \sum_i C_i \frac{\partial \mathcal{L}_i}{\partial \mathbf{W}}$ , the time complexity is  $2BpD$  with no space complexity.

### C.6 Combining the modules to algorithms

- Ghost clipping = Back-propagation + Ghost norm + Second back-propagation
- Opacus = Back-propagation + Gradient instantiation + Weighted gradient
- FastGradClip = Back-propagation + Gradient instantiation + Second back-propagation
- Mixed ghost clipping = Back-propagation +  $\min\{\text{Ghost norm, Gradient instantiation}\} + \text{Second back-propagation}$

## D ViT details

Our ViTs are imported from PyTorch Image Models [46]. For all ViTs, if they contain the batch normalization, we replace with the group normalization (16 groups). We freeze modules that are not supported by our privacy engine. We do not apply learning rate schedule, random data augmentation, weight standardization, or parameter averaging as in [9]. We describe the models as their configuration argument in [46].

| Dataset | Model & # Param                  | Package        | Memory (GB)                   | Accuracy (%)     | Max Batch Size | Min Time/Epoch |
|---------|----------------------------------|----------------|-------------------------------|------------------|----------------|----------------|
| CIFAR10 | crossvit_18_240<br>42.6M         | Mixed<br>NonDP | 4.49   5.00<br>4.07   4.87    | 95.08<br>97.11   | 72<br>78       | 700<br>420     |
|         | crossvit_15_240<br>27.0M         | Mixed<br>NonDP | 3.42   3.48<br>3.08   3.31    | 93.97<br>96.66   | 95<br>103      | 507<br>303     |
|         | crossvit_9_240<br>8.2M           | Mixed<br>NonDP | 1.63   1.66<br>1.45   1.63    | 88.67<br>93.33   | 187<br>212     | 248<br>180     |
|         | crossvit_base_240<br>103.9M      | Mixed<br>NonDP | 7.33   7.49<br>6.49   6.85    | 95.22<br>97.37   | 48<br>53       | 1228<br>731    |
|         | crossvit_small_240<br>26.3M      | Mixed<br>NonDP | 3.21   3.25<br>2.88   3.13    | 94.05<br>96.17   | 102<br>110     | 463<br>287     |
|         | crossvit_tiny_240<br>6.7M        | Mixed<br>NonDP | 1.47   1.64<br>1.34   1.62    | 88.31<br>93.12   | 204<br>223     | 233<br>167     |
|         | deit_base_patch16_224<br>85.8M   | Mixed<br>NonDP | 4.15   4.47<br>3.76   4.06    | 94.56<br>97.14   | 82<br>86       | 882<br>513     |
|         | deit_small_patch16_224<br>21.7M  | Mixed<br>NonDP | 1.88   1.97<br>1.75   1.85    | 91.16<br>96.35   | 170<br>176     | 330<br>204     |
|         | deit_tiny_patch16_224<br>5.5M    | Mixed<br>NonDP | 0.89   1.02<br>0.84   1.00    | 84.22<br>93.46   | 346<br>360     | 175<br>154     |
|         | beit_large_patch16_224<br>303.4M | Mixed<br>NonDP | 10.72   11.27<br>9.83   10.23 | 93.94<br>97.80   | 27<br>30       | 2703<br>1597   |
|         | beit_base_patch16_224<br>85.8M   | Mixed<br>NonDP | 3.84   4.06<br>3.56   3.79    | 91.68<br>97.14   | 86<br>91       | 805<br>506     |
|         | convit_base<br>85.8M             | Mixed<br>NonDP | 6.46   6.77<br>5.93   6.31    | 94.76<br>96.82   | 47<br>50       | 1115<br>649    |
|         | convit_small<br>27.3M            | Mixed<br>NonDP | 3.45   3.65<br>3.22   3.51    | 93.16<br>97.07   | 86<br>90       | 513<br>311     |
|         | convit_tiny<br>5.5M              | Mixed<br>NonDP | 1.54   1.63<br>1.47   1.57    | 86.56<br>94.51   | 199<br>200     | 236<br>157     |
|         | vit_base_patch16_224<br>85.8M    | Mixed<br>NonDP | 4.80   5.13<br>4.40   4.91    | 94.40*<br>97.43* | 82<br>86       | 926<br>550     |
|         | vit_small_patch16_224<br>21.7M   | Mixed<br>NonDP | 2.04   2.13<br>1.92   2.04    | 92.77<br>97.69   | 170<br>176     | 334<br>204     |
|         | vit_tiny_patch16_224<br>5.5M     | Mixed<br>NonDP | 0.93   1.04<br>0.89   1.02    | 87.56<br>95.20   | 346<br>360     | 179<br>163     |

Table 8: Performance of selected ViTs on CIFAR10 under  $\epsilon = 2$ . Here batch size 1000, physical batch size 20, except for max (physical) batch size and min time/epoch (using max batch size). There are two types of memory: active memory (left) and total memory (right). All ViTs use DP learning rate  $2e - 3$  and non-DP learning rate  $2e - 4$  by default, except the ViT base that uses half the learning rate, since the default learning rate gives  $< 80\%$  accuracy.

| Dataset  | Model & # Param                  | Package        | Memory (GB)                   | Accuracy (%)     | Max<br>Batch Size | Min<br>Time/Epoch |
|----------|----------------------------------|----------------|-------------------------------|------------------|-------------------|-------------------|
| CIFAR100 | crossvit_18_240<br>42.7M         | Mixed<br>NonDP | 4.49   5.00<br>4.07   4.87    | 71.78<br>79.46   | 72<br>78          | 696<br>421        |
|          | crossvit_15_240<br>27.0M         | Mixed<br>NonDP | 3.42   3.50<br>3.08   3.31    | 67.21<br>75.31   | 95<br>103         | 495<br>302        |
|          | crossvit_9_240<br>8.2M           | Mixed<br>NonDP | 1.63   1.66<br>1.45   1.63    | 56.60<br>59.92   | 187<br>212        | 247<br>168        |
|          | crossvit_base_240<br>104.0M      | Mixed<br>NonDP | 7.34   7.60<br>6.50   6.85    | 69.09<br>80.85   | 48<br>53          | 1221<br>730       |
|          | crossvit_small_240<br>26.3M      | Mixed<br>NonDP | 3.21   3.25<br>2.88   3.13    | 67.73<br>75.37   | 102<br>110        | 468<br>285        |
|          | crossvit_tiny_240<br>6.8M        | Mixed<br>NonDP | 1.47   1.65<br>1.34   1.62    | 54.31<br>59.03   | 204<br>223        | 239<br>164        |
|          | deit_base_patch16_224<br>85.8M   | Mixed<br>NonDP | 4.15   4.47<br>3.76   4.06    | 70.04<br>85.70   | 82<br>86          | 920<br>549        |
|          | deit_small_patch16_224<br>21.7M  | Mixed<br>NonDP | 1.88   1.97<br>1.75   1.85    | 62.73<br>80.35   | 170<br>176        | 332<br>206        |
|          | deit_tiny_patch16_224<br>5.5M    | Mixed<br>NonDP | 0.89   1.02<br>0.84   1.00    | 49.92<br>65.18   | 346<br>360        | 176<br>148        |
|          | beit_large_patch16_224<br>303.4M | Mixed<br>NonDP | 10.72   11.27<br>9.83   10.23 | 77.46<br>89.85   | 27<br>30          | 2707<br>1592      |
|          | beit_base_patch16_224<br>85.8M   | Mixed<br>NonDP | 3.84   4.06<br>3.56   3.79    | 61.36<br>83.00   | 86<br>91          | 809<br>505        |
|          | convit_base<br>85.8M             | Mixed<br>NonDP | 6.46   6.77<br>5.93   6.31    | 71.61<br>85.49   | 47<br>50          | 1136<br>682       |
|          | convit_small<br>27.3M            | Mixed<br>NonDP | 3.45   3.65<br>3.22   3.51    | 65.98<br>82.85   | 86<br>90          | 525<br>310        |
|          | convit_tiny<br>21.7M             | Mixed<br>NonDP | 1.54   1.63<br>1.47   1.57    | 51.72<br>70.48   | 194<br>200        | 235<br>160        |
|          | vit_base_patch16_224<br>85.9M    | Mixed<br>NonDP | 4.80   5.13<br>4.40   4.91    | 65.78*<br>90.21* | 82<br>86          | 917<br>550        |
|          | vit_small_patch16_224<br>21.7M   | Mixed<br>NonDP | 2.05   2.13<br>1.92   2.04    | 73.34<br>86.93   | 170<br>176        | 330<br>204        |
|          | vit_tiny_patch16_224<br>5.5M     | Mixed<br>NonDP | 0.93   1.04<br>0.89   1.02    | 49.54<br>72.30   | 346<br>360        | 176<br>156        |

Table 9: Performance of selected ViTs on CIFAR10 under  $\epsilon = 2$ . Here batch size 1000, physical batch size 20, except for max (physical) batch size and min time/epoch (using max batch size). There are two types of memory: active memory (left) and total memory (right). All ViTs use DP learning rate  $2e - 3$  and non-DP learning rate  $2e - 4$  by default, except the ViT base that uses half the learning rate, since the default learning rate gives  $< 50\%$  accuracy.

## E Demo of privacy engine

We demonstrate how to use our privacy engine to train any vision models differentially privately. We term our library as *private\_vision*, which is significantly based on the *private\_transformers* library [32] at <https://github.com/lxuechen/private-transformers>. We provide two modes through the ‘mode’ argument in the privacy engine: ‘ghost-mixed’ for the mixed ghost clipping, and ‘ghost’ for the ghost clipping.

```
import torchvision, torch, timm, opacus
from private_vision import PrivacyEngine

model = torchvision.models.resnet18()
# model = timm.create_model('crossvit_small_240', pretrained= True)

model=opacus.validators.ModuleValidator.fix(model)
# replace BatchNorm by GroupNorm or LayerNorm

optimizer = torch.optim.Adam(params=model.parameters(), lr=1e-4)
privacy_engine = PrivacyEngine(
    model,
    batch_size=256,
    sample_size=50000,
    epochs=3,
    max_grad_norm=0.1,
    target_epsilon=3,
    mode='ghost-mixed',
)
privacy_engine.attach(optimizer)

# Same training procedure, e.g. data loading, forward pass...
loss = F.cross_entropy(model(batch), labels, reduction="none")
# do not use loss.backward()
optimizer.step(loss=loss)
```

A special use of our privacy engine is to use the gradient accumulation. This is achieved with virtual step function.

```
import torchvision, torch, timm, opacus
from private_vision import PrivacyEngine

gradient_accumulation_steps = 10
# Batch size/physical batch size.

model = torchvision.models.resnet18()
model=opacus.validators.ModuleValidator.fix(model)
optimizer = torch.optim.Adam(model.parameters())
privacy_engine = PrivacyEngine(...)
privacy_engine.attach(optimizer)

for i, batch in enumerate(dataloader):
    loss = F.cross_entropy(model(batch), labels, reduction="none")
    if i % gradient_accumulation_steps == 0:
        optimizer.step(loss=loss)
        optimizer.zero_grad()
    else:
        optimizer.virtual_step(loss=loss)
```



## F Comparison with GhostClip in [32]

We give a thorough comparison between our work and [32] (specifically codebase v0.1.0 which was the public version during the preparation of this paper), which distinguishes our contribution from a simple application of ghost clipping on convolutional layers.

1. Our contribution is on Conv1d/2d/3d layers, while [32] applies the ghost clipping on linear and embedding layers. To be specific, we show that  $T_{(l)}$  is layer-dependent (which motivates the layerwise decision in (4.1)), while [32] studies sequential data and  $T$  is layer-independent. We also precisely quantifies the effect of kernel size/padding/stride on the complexity in DP training in Appendix B.
2. We provide a fine-grained complexity analysis of the clipping (see Section 4.1), while [32] shows only asymptotic complexity. For example, we show that the space complexity of ghost norm technique is  $2T_{(l)}^2$  and that of per-sample gradient instantiation is  $p_{(l)}d_{(l)}$ . In contrast, [32] gives  $O(T^2)$  and  $O(pd)$ , respectively. We highlight that our mixed ghost clipping, or the layerwise decision (4.1), is only made possible through our complexity analysis.
3. We additionally analyze the complexity of entire DP algorithms – e.g. Opacus, FastGradClip, and GhostClip, while [32] only focuses on the clipping part of algorithms. Thus their analysis cannot directly help us to compare different DP algorithms, which not only include the clipping but also the back-propagation. Notice that ghost clipping needs two back-propagation but Opacus only needs one back-propagation, so it is insufficient to study the complexity difference between DP algorithms by only looking at the complexity of the clipping part.
4. Our key contribution is the mixed ghost clipping, which is novel, simple, but extremely important on large image tasks. Our mixed ghost clipping is much more efficient than the vanilla ghost clipping, as visualized in Table 3, Figure 3 and especially Table 7 (on  $224 \times 224$  ImageNet). As a concrete example on ImageNet, ghost clipping incurs huge memory cost on most models (e.g. ResNet18, more than 16GB and thus OOM), while mixed ghost clipping costs only 2.34GB memory for ResNet18 and 7.91GB for ResNet152, almost the same as non-DP training.
